# Supplementary material for: H-bonded reusable template assisted para-selective ketonisation using soft electrophilic vinyl ethers
Source: PubMed Central journal article supplement (PMC6123475; doi:10.1038/s41467-018-06018-2), 2018-09-04
Supplement: 41467_2018_6018_MOESM3_ESM.pdf [file 41467_2018_6018_MOESM3_ESM.pdf]

## Supplementary Data

### **H-Bonded Reusable Template-Assisted *Para*-Selective Ketonisation Using Soft Electrophilic Vinyl Ethers**

Maji et al.

## Cartesian Coordinates:

5  
B3LYP electronic energy: -2295.85867899 a.u.  
B3LYP enthalpy: -2295.158751 a.u.  
B3LYP free energy: -2295.276747 a.u.  
M06 SCF energy in solution: -2295.13848516 a.u.  
M06 enthalpy in solution: -2294.438557 a.u.  
M06 free energy in solution: -2294.556553 a.u.

### Cartesian coordinates

| ATOM | X         | Y         | Z         |
|------|-----------|-----------|-----------|
| Pd   | 2.203135  | -0.794580 | -0.295822 |
| C    | 0.408802  | -1.590722 | -0.562273 |
| C    | -0.017252 | -2.601328 | 0.306187  |
| C    | -1.288872 | -3.164366 | 0.156208  |
| C    | -2.157723 | -2.743099 | -0.861957 |
| C    | -1.695160 | -1.763102 | -1.751192 |
| C    | -0.432865 | -1.183872 | -1.602306 |
| H    | 0.636974  | -2.960373 | 1.096092  |
| H    | -1.604134 | -3.948896 | 0.842383  |
| H    | -2.340525 | -1.428146 | -2.560905 |
| C    | -3.565706 | -3.283199 | -0.973710 |
| H    | -3.592947 | -4.349226 | -0.708373 |
| H    | -3.911524 | -3.220970 | -2.014132 |
| Si   | -4.867180 | -2.399808 | 0.109635  |
| C    | -6.625109 | -2.873460 | -0.462235 |
| H    | -7.297379 | -2.622174 | 0.373029  |
| C    | -4.577446 | -2.735219 | 1.967751  |
| H    | -3.510313 | -2.532098 | 2.144833  |
| C    | -7.083262 | -2.059679 | -1.688674 |
| H    | -6.443357 | -2.254381 | -2.559330 |
| H    | -8.107919 | -2.334998 | -1.972957 |
| H    | -7.059356 | -0.983655 | -1.495564 |
| C    | -6.770673 | -4.384529 | -0.743634 |
| H    | -6.506106 | -5.006130 | 0.118517  |
| H    | -7.806565 | -4.626602 | -1.015761 |
| H    | -6.136746 | -4.696877 | -1.582777 |
| C    | -4.825614 | -4.204120 | 2.369353  |
| H    | -4.246741 | -4.910828 | 1.762449  |
| H    | -4.545427 | -4.368778 | 3.418142  |
| H    | -5.884565 | -4.472996 | 2.274211  |
| C    | -5.396034 | -1.784851 | 2.864619  |
| H    | -5.178692 | -1.967466 | 3.925576  |
| H    | -5.180013 | -0.731694 | 2.656094  |
| H    | -6.474498 | -1.934306 | 2.725524  |
| O    | -4.822143 | -0.724414 | -0.175088 |
| C    | -3.915525 | 0.279772  | -0.059632 |
| C    | -2.868364 | 0.276944  | 0.871652  |
| C    | -4.068764 | 1.387550  | -0.907589 |
| C    | -1.967636 | 1.336718  | 0.914393  |
| H    | -2.739937 | -0.561231 | 1.545731  |
| C    | -3.169109 | 2.445868  | -0.851605 |

|   |           |           |           |
|---|-----------|-----------|-----------|
| H | -4.887694 | 1.388379  | -1.620095 |
| C | -2.087137 | 2.434386  | 0.046793  |
| H | -1.166046 | 1.311720  | 1.646741  |
| H | -3.283828 | 3.278521  | -1.540801 |
| C | -1.113707 | 3.551833  | 0.071637  |
| C | -1.569097 | 4.881643  | 0.103365  |
| C | 0.282816  | 3.348992  | 0.053865  |
| C | -0.695468 | 5.966456  | 0.131220  |
| H | -2.638333 | 5.050767  | 0.135578  |
| C | 1.183059  | 4.442270  | 0.091909  |
| C | 0.712252  | 5.743562  | 0.133345  |
| H | 2.246789  | 4.240613  | 0.073524  |
| C | 0.845255  | 2.048152  | -0.075060 |
| N | 1.358064  | 1.013696  | -0.200392 |
| O | 1.482506  | 6.858199  | 0.173089  |
| O | -1.072198 | 7.262276  | 0.172905  |
| C | -2.461470 | 7.568643  | 0.173301  |
| H | -2.961444 | 7.153836  | 1.057372  |
| H | -2.521962 | 8.657379  | 0.198158  |
| H | -2.952788 | 7.194891  | -0.733679 |
| C | 2.894129  | 6.693702  | 0.178493  |
| H | 3.309369  | 7.701557  | 0.219617  |
| H | 3.227742  | 6.125053  | 1.056233  |
| H | 3.242700  | 6.192534  | -0.733845 |
| H | -0.119122 | -0.409542 | -2.296482 |
| C | 5.689153  | -2.807309 | -0.060085 |
| C | 4.434895  | -1.957921 | -0.128407 |
| O | 3.312596  | -2.558363 | -0.282451 |
| O | 4.490089  | -0.700055 | -0.038805 |
| H | 5.757448  | -3.404461 | -0.978864 |
| H | 5.582312  | -3.524787 | 0.763961  |
| N | 6.847823  | -1.964257 | 0.115426  |
| H | 6.697018  | -0.965195 | 0.157475  |
| C | 8.097286  | -2.485577 | 0.198561  |
| O | 8.370356  | -3.673513 | 0.148368  |
| O | 9.016738  | -1.488971 | 0.348543  |
| C | 10.369320 | -1.942853 | 0.446044  |
| H | 10.972513 | -1.040261 | 0.558260  |
| H | 10.501327 | -2.598069 | 1.312118  |
| H | 10.665466 | -2.488186 | -0.454882 |

vinyl-methyl-ether

|                                  |                              |
|----------------------------------|------------------------------|
| B3LYP SCF energy:                | -193.10696528 a.u.           |
| B3LYP enthalpy:                  | -193.015982 a.u.             |
| B3LYP free energy:               | -193.050191 a.u.             |
| M06 SCF energy in solution:      | -193.03568264 a.u.           |
| M06 enthalpy in solution:        | -192.944699 a.u.             |
| M06 free energy in solution:     | -192.978908 a.u.             |
| Three lowest frequencies (cm-1): | 46.5019 168.0803<br>316.0482 |

Cartesian coordinates

| ATOM | X         | Y        | Z         |
|------|-----------|----------|-----------|
| C    | -0.614684 | 0.352909 | -0.044745 |

|   |           |           |           |
|---|-----------|-----------|-----------|
| H | -0.364455 | 1.412863  | -0.116138 |
| C | -1.874592 | -0.073417 | 0.048697  |
| H | -2.689710 | 0.640448  | 0.042100  |
| H | -2.111161 | -1.129890 | 0.120906  |
| O | 0.447061  | -0.499897 | -0.085205 |
| C | 1.721656  | 0.107700  | 0.056756  |
| H | 2.462099  | -0.681426 | -0.089360 |
| H | 1.880075  | 0.891623  | -0.697504 |
| H | 1.852379  | 0.542398  | 1.057388  |

6

|                                  |                     |
|----------------------------------|---------------------|
| B3LYP SCF energy:                | -2488.98612970 a.u. |
| B3LYP enthalpy:                  | -2488.192560 a.u.   |
| B3LYP free energy:               | -2488.336316 a.u.   |
| M06 SCF energy in solution:      | -2488.20621525 a.u. |
| M06 enthalpy in solution:        | -2487.412646 a.u.   |
| M06 free energy in solution:     | -2487.556402 a.u.   |
| Three lowest frequencies (cm-1): | 9.4566 18.0622      |
| 21.3487                          |                     |

#### Cartesian coordinates

| ATOM | X         | Y         | Z         |
|------|-----------|-----------|-----------|
| C    | -1.156309 | -2.344535 | -0.119149 |
| C    | -2.131761 | -2.689866 | 0.827425  |
| C    | -3.479150 | -2.371548 | 0.621209  |
| C    | -3.900544 | -1.699015 | -0.535282 |
| C    | -2.925725 | -1.386478 | -1.493732 |
| C    | -1.579672 | -1.700455 | -1.290634 |
| H    | -1.849457 | -3.198268 | 1.747294  |
| H    | -4.211784 | -2.654912 | 1.375584  |
| H    | -3.220270 | -0.872292 | -2.406877 |
| C    | -5.344638 | -1.297280 | -0.740496 |
| H    | -6.017146 | -2.091725 | -0.386582 |
| H    | -5.550310 | -1.186641 | -1.813585 |
| Si   | -5.919449 | 0.317786  | 0.104220  |
| C    | -7.608965 | 0.844428  | -0.611540 |
| H    | -8.043319 | 1.547672  | 0.116351  |
| C    | -5.952191 | 0.143089  | 2.006311  |
| H    | -4.969244 | -0.263905 | 2.287668  |
| C    | -7.473839 | 1.592909  | -1.952569 |
| H    | -7.031157 | 0.952125  | -2.726500 |
| H    | -8.460282 | 1.907723  | -2.319051 |
| H    | -6.843493 | 2.481443  | -1.859744 |
| C    | -8.589047 | -0.339314 | -0.760700 |
| H    | -8.753060 | -0.878272 | 0.178688  |
| H    | -9.568268 | 0.014279  | -1.109982 |
| H    | -8.228353 | -1.065809 | -1.499587 |
| C    | -7.011507 | -0.857513 | 2.512791  |
| H    | -6.920113 | -1.843898 | 2.042221  |
| H    | -6.915841 | -1.003079 | 3.596946  |
| H    | -8.028961 | -0.492967 | 2.327477  |
| C    | -6.118910 | 1.505241  | 2.709909  |
| H    | -6.089861 | 1.385996  | 3.801309  |
| H    | -5.332420 | 2.214310  | 2.430996  |

|    |           |           |           |
|----|-----------|-----------|-----------|
| H  | -7.082819 | 1.966827  | 2.460908  |
| O  | -4.909520 | 1.610057  | -0.330575 |
| C  | -3.597733 | 1.938960  | -0.185442 |
| C  | -2.799823 | 1.492195  | 0.875939  |
| C  | -3.037580 | 2.799321  | -1.141521 |
| C  | -1.458718 | 1.858075  | 0.944232  |
| H  | -3.215087 | 0.844052  | 1.638286  |
| C  | -1.696285 | 3.159321  | -1.064125 |
| H  | -3.664233 | 3.153893  | -1.953977 |
| C  | -0.871021 | 2.677253  | -0.032640 |
| H  | -0.863137 | 1.500990  | 1.778887  |
| H  | -1.270077 | 3.790471  | -1.839648 |
| C  | 0.579267  | 2.987947  | -0.014727 |
| C  | 1.039160  | 4.301701  | -0.206738 |
| C  | 1.555551  | 1.983912  | 0.149747  |
| C  | 2.398190  | 4.613286  | -0.231454 |
| H  | 0.303650  | 5.089549  | -0.314610 |
| C  | 2.938597  | 2.280761  | 0.118428  |
| C  | 3.370973  | 3.583550  | -0.069250 |
| H  | 3.645003  | 1.464953  | 0.212222  |
| C  | 1.197194  | 0.614470  | 0.283656  |
| N  | 0.973379  | -0.518322 | 0.386356  |
| O  | 4.663743  | 3.980378  | -0.119050 |
| O  | 2.901474  | 5.856485  | -0.398020 |
| C  | 1.998022  | 6.940934  | -0.564816 |
| H  | 1.349052  | 7.059739  | 0.312016  |
| H  | 2.621751  | 7.828673  | -0.678367 |
| H  | 1.378924  | 6.812340  | -1.461743 |
| C  | 5.673370  | 2.981380  | 0.005359  |
| H  | 6.622770  | 3.514892  | -0.050797 |
| H  | 5.603921  | 2.457341  | 0.965923  |
| H  | 5.618657  | 2.249290  | -0.807964 |
| Pd | 0.807213  | -2.582117 | 0.260438  |
| H  | -0.853673 | -1.407785 | -2.046275 |
| C  | 5.080662  | -1.954887 | 0.966253  |
| C  | 3.728019  | -2.057658 | 0.238520  |
| O  | 2.851365  | -2.757047 | 0.862879  |
| O  | 3.589673  | -1.477207 | -0.853236 |
| H  | 5.574176  | -2.936813 | 0.947553  |
| H  | 4.914389  | -1.706862 | 2.019069  |
| N  | 5.879096  | -0.937613 | 0.312348  |
| H  | 5.532961  | -0.656760 | -0.598650 |
| C  | 7.143162  | -0.642137 | 0.698369  |
| O  | 7.722210  | -1.092023 | 1.672448  |
| O  | 7.694660  | 0.280230  | -0.156965 |
| C  | 9.047459  | 0.628899  | 0.149714  |
| H  | 9.344843  | 1.349400  | -0.614650 |
| H  | 9.122553  | 1.076384  | 1.145226  |
| H  | 9.697101  | -0.250540 | 0.112927  |
| C  | 0.894565  | -4.471156 | -1.053635 |
| H  | 0.096438  | -4.269736 | -1.770589 |
| C  | 0.622756  | -4.729085 | 0.285188  |
| H  | -0.402504 | -4.937713 | 0.572654  |
| H  | 1.418621  | -5.114977 | 0.916090  |
| O  | 2.106790  | -4.686963 | -1.568014 |
| C  | 2.430415  | -3.980268 | -2.777654 |

|   |          |           |           |
|---|----------|-----------|-----------|
| H | 3.261034 | -4.521934 | -3.231970 |
| H | 1.572027 | -3.976503 | -3.461936 |
| H | 2.733358 | -2.960946 | -2.520781 |

TS1

|                                  |                                  |
|----------------------------------|----------------------------------|
| B3LYP SCF energy:                | -2488.95514615 a.u.              |
| B3LYP enthalpy:                  | -2488.163200 a.u.                |
| B3LYP free energy:               | -2488.306470 a.u.                |
| M06 SCF energy in solution:      | -2488.17971477 a.u.              |
| M06 enthalpy in solution:        | -2487.387769 a.u.                |
| M06 free energy in solution:     | -2487.531039 a.u.                |
| Three lowest frequencies (cm-1): | -337.2936      7.8672<br>13.4165 |
| Imaginary frequency:             | -337.2936 cm-1                   |

Cartesian coordinates

| ATOM | X         | Y         | Z         |
|------|-----------|-----------|-----------|
| C    | -1.239486 | -2.694029 | -0.403254 |
| C    | -2.162328 | -2.725182 | 0.662002  |
| C    | -3.374729 | -2.044196 | 0.592940  |
| C    | -3.726587 | -1.298068 | -0.547659 |
| C    | -2.800706 | -1.250839 | -1.604218 |
| C    | -1.596285 | -1.954945 | -1.546167 |
| H    | -1.937405 | -3.311723 | 1.551329  |
| H    | -4.074632 | -2.120356 | 1.421878  |
| H    | -3.045153 | -0.683896 | -2.499956 |
| C    | -5.091772 | -0.662677 | -0.685093 |
| H    | -5.860231 | -1.429468 | -0.503516 |
| H    | -5.241018 | -0.342264 | -1.724748 |
| Si   | -5.639542 | 0.820793  | 0.397180  |
| C    | -7.371396 | 1.374190  | -0.183673 |
| H    | -7.768280 | 1.996979  | 0.633380  |
| C    | -5.583893 | 0.415897  | 2.262996  |
| H    | -4.562234 | 0.054895  | 2.455353  |
| C    | -7.316156 | 2.255432  | -1.447768 |
| H    | -6.928548 | 1.696531  | -2.309837 |
| H    | -8.321826 | 2.605219  | -1.716904 |
| H    | -6.676269 | 3.130398  | -1.305191 |
| C    | -8.352562 | 0.201559  | -0.394484 |
| H    | -8.459150 | -0.430471 | 0.493649  |
| H    | -9.351997 | 0.578265  | -0.648789 |
| H    | -8.033524 | -0.443244 | -1.223050 |
| C    | -6.549124 | -0.709329 | 2.690049  |
| H    | -6.422486 | -1.624994 | 2.099422  |
| H    | -6.388647 | -0.975385 | 3.743090  |
| H    | -7.595827 | -0.396925 | 2.595433  |
| C    | -5.807757 | 1.673189  | 3.128419  |
| H    | -5.700019 | 1.435017  | 4.194903  |
| H    | -5.096784 | 2.471143  | 2.889884  |
| H    | -6.817693 | 2.079182  | 2.988555  |
| O    | -4.686825 | 2.182975  | 0.083738  |
| C    | -3.337672 | 2.398447  | 0.082705  |
| C    | -2.509947 | 1.991570  | 1.135347  |
| C    | -2.783292 | 3.094604  | -0.998804 |

|    |           |           |           |
|----|-----------|-----------|-----------|
| C  | -1.139104 | 2.223490  | 1.071196  |
| H  | -2.932641 | 1.493439  | 2.000507  |
| C  | -1.411851 | 3.326341  | -1.050995 |
| H  | -3.437455 | 3.424601  | -1.799927 |
| C  | -0.560167 | 2.870672  | -0.030893 |
| H  | -0.510318 | 1.895634  | 1.893421  |
| H  | -0.987431 | 3.828707  | -1.916225 |
| C  | 0.911687  | 3.012191  | -0.148950 |
| C  | 1.504359  | 4.251099  | -0.439607 |
| C  | 1.762738  | 1.897779  | -0.019359 |
| C  | 2.884644  | 4.386905  | -0.586574 |
| H  | 0.862242  | 5.119263  | -0.528169 |
| C  | 3.161841  | 2.013685  | -0.179720 |
| C  | 3.730456  | 3.247990  | -0.457397 |
| H  | 3.757412  | 1.109726  | -0.126039 |
| C  | 1.237609  | 0.591957  | 0.207137  |
| N  | 0.866381  | -0.494133 | 0.380158  |
| O  | 5.053890  | 3.476164  | -0.631047 |
| O  | 3.521430  | 5.551962  | -0.850768 |
| C  | 2.744504  | 6.731259  | -0.999181 |
| H  | 2.189096  | 6.964724  | -0.081656 |
| H  | 3.457919  | 7.530816  | -1.204563 |
| H  | 2.041071  | 6.646247  | -1.837578 |
| C  | 5.938724  | 2.363507  | -0.528715 |
| H  | 6.939218  | 2.764974  | -0.691680 |
| H  | 5.889206  | 1.898662  | 0.462259  |
| H  | 5.718511  | 1.608417  | -1.292607 |
| Pd | 0.822460  | -2.605630 | 0.092049  |
| H  | -0.930438 | -1.942460 | -2.405992 |
| C  | 5.105142  | -2.260687 | 0.983646  |
| C  | 3.757585  | -2.044000 | 0.266225  |
| O  | 2.814456  | -2.773114 | 0.746868  |
| O  | 3.693039  | -1.230504 | -0.668849 |
| H  | 5.371220  | -3.323751 | 0.924699  |
| H  | 4.998292  | -2.022323 | 2.047954  |
| N  | 6.106335  | -1.418975 | 0.365609  |
| H  | 5.798543  | -0.938760 | -0.471767 |
| C  | 7.279932  | -1.106717 | 0.958524  |
| O  | 7.704112  | -1.563950 | 2.006975  |
| O  | 7.956618  | -0.176735 | 0.205420  |
| C  | 9.241931  | 0.173333  | 0.724065  |
| H  | 9.658075  | 0.893070  | 0.016345  |
| H  | 9.157064  | 0.623055  | 1.717895  |
| H  | 9.889419  | -0.705727 | 0.793460  |
| C  | -0.557309 | -4.590012 | -0.812276 |
| H  | -1.290619 | -5.035057 | -0.139799 |
| C  | 0.821348  | -4.574445 | -0.401714 |
| H  | 1.045367  | -5.109453 | 0.522672  |
| H  | 1.552393  | -4.722468 | -1.197065 |
| O  | -0.805937 | -4.791287 | -2.126796 |
| C  | -2.166860 | -5.024187 | -2.491929 |
| H  | -2.150706 | -5.332848 | -3.538135 |
| H  | -2.599830 | -5.826126 | -1.880229 |
| H  | -2.759841 | -4.110414 | -2.383088 |

7

|                                  |                     |
|----------------------------------|---------------------|
| B3LYP SCF energy:                | -2489.00052534 a.u. |
| B3LYP enthalpy:                  | -2488.205727 a.u.   |
| B3LYP free energy:               | -2488.351450 a.u.   |
| M06 SCF energy in solution:      | -2488.21186039 a.u. |
| M06 enthalpy in solution:        | -2487.417062 a.u.   |
| M06 free energy in solution:     | -2487.562785 a.u.   |
| Three lowest frequencies (cm-1): | 6.1938 11.2742      |
| 14.2923                          |                     |

## Cartesian coordinates

| ATOM | X         | Y         | Z         |
|------|-----------|-----------|-----------|
| C    | -1.642285 | -0.197652 | 2.250677  |
| C    | -2.462200 | -0.825392 | 1.306180  |
| C    | -2.255805 | -2.159148 | 0.949622  |
| C    | -1.226109 | -2.914647 | 1.530353  |
| C    | -0.401443 | -2.276666 | 2.470517  |
| C    | -0.607114 | -0.945094 | 2.827209  |
| H    | -3.277463 | -0.266232 | 0.852810  |
| H    | -2.926369 | -2.627535 | 0.231897  |
| H    | 0.399376  | -2.839984 | 2.944948  |
| C    | -1.030697 | -4.375202 | 1.188528  |
| H    | -2.007507 | -4.866307 | 1.075733  |
| H    | -0.534859 | -4.887539 | 2.024028  |
| Si   | -0.024784 | -4.799646 | -0.374679 |
| C    | 0.349009  | -6.671413 | -0.397652 |
| H    | 0.655340  | -6.904843 | -1.429271 |
| C    | -0.889291 | -4.199092 | -1.967442 |
| H    | -1.038227 | -3.117131 | -1.830559 |
| C    | 1.521273  | -7.053155 | 0.528302  |
| H    | 1.283755  | -6.849469 | 1.580787  |
| H    | 1.739906  | -8.126715 | 0.449650  |
| H    | 2.431848  | -6.500282 | 0.281429  |
| C    | -0.887490 | -7.535554 | -0.070204 |
| H    | -1.733882 | -7.339240 | -0.737198 |
| H    | -0.644357 | -8.602841 | -0.157050 |
| H    | -1.231105 | -7.367368 | 0.958022  |
| C    | -2.288302 | -4.814284 | -2.183103 |
| H    | -2.944949 | -4.685468 | -1.314841 |
| H    | -2.785365 | -4.342807 | -3.040899 |
| H    | -2.227984 | -5.887648 | -2.399129 |
| C    | -0.016859 | -4.408452 | -3.222296 |
| H    | -0.503006 | -3.982033 | -4.109753 |
| H    | 0.970492  | -3.943547 | -3.128556 |
| H    | 0.140633  | -5.475838 | -3.422143 |
| O    | 1.523439  | -4.117256 | -0.248733 |
| C    | 2.103164  | -2.890617 | -0.280944 |
| C    | 1.660078  | -1.847893 | -1.105911 |
| C    | 3.242241  | -2.690996 | 0.514168  |
| C    | 2.339511  | -0.633366 | -1.124597 |
| H    | 0.794594  | -1.984433 | -1.742218 |
| C    | 3.911393  | -1.473000 | 0.491482  |
| H    | 3.581574  | -3.502325 | 1.150506  |
| C    | 3.471563  | -0.413901 | -0.323265 |
| H    | 1.991592  | 0.144381  | -1.797318 |



|    |           |           |           |
|----|-----------|-----------|-----------|
| H  | 4.774460  | -1.329928 | 1.136354  |
| C  | 4.199237  | 0.876816  | -0.343797 |
| C  | 5.604227  | 0.890388  | -0.407393 |
| C  | 3.545626  | 2.126812  | -0.298963 |
| C  | 6.336573  | 2.074773  | -0.436001 |
| H  | 6.119393  | -0.060351 | -0.466331 |
| C  | 4.276888  | 3.338910  | -0.337425 |
| C  | 5.659621  | 3.328291  | -0.407470 |
| H  | 3.733429  | 4.274720  | -0.298562 |
| C  | 2.132981  | 2.218159  | -0.153184 |
| N  | 0.983664  | 2.328916  | -0.029321 |
| O  | 6.454526  | 4.425464  | -0.450900 |
| O  | 7.683048  | 2.150513  | -0.506845 |
| C  | 8.433222  | 0.942342  | -0.538171 |
| H  | 8.189541  | 0.343482  | -1.424562 |
| H  | 9.479501  | 1.247461  | -0.581784 |
| H  | 8.263563  | 0.343767  | 0.365511  |
| C  | 5.831036  | 5.702205  | -0.434676 |
| H  | 6.643034  | 6.428822  | -0.486046 |
| H  | 5.167114  | 5.834776  | -1.298815 |
| H  | 5.260334  | 5.858139  | 0.490102  |
| Pd | -0.996564 | 2.417843  | 0.101851  |
| H  | 0.019450  | -0.483944 | 3.585764  |
| C  | -4.421683 | 2.858812  | -2.015876 |
| C  | -3.089753 | 2.688280  | -1.307801 |
| O  | -2.020788 | 2.697513  | -1.964424 |
| O  | -3.081748 | 2.545535  | -0.026250 |
| H  | -4.522584 | 2.074215  | -2.774700 |
| H  | -4.390307 | 3.811630  | -2.562331 |
| N  | -5.524865 | 2.807046  | -1.082646 |
| H  | -5.304754 | 2.800051  | -0.096097 |
| C  | -6.788325 | 2.531787  | -1.498354 |
| O  | -7.137301 | 2.400169  | -2.659745 |
| O  | -7.624945 | 2.428469  | -0.426336 |
| C  | -8.988476 | 2.158132  | -0.763135 |
| H  | -9.402770 | 2.955595  | -1.386937 |
| H  | -9.078720 | 1.209371  | -1.300194 |
| H  | -9.519376 | 2.107057  | 0.188955  |
| C  | -1.881860 | 1.246905  | 2.672311  |
| H  | -2.885932 | 1.549691  | 2.339999  |
| C  | -0.855308 | 2.230963  | 2.116094  |
| H  | -1.061625 | 3.240491  | 2.492760  |
| H  | 0.159208  | 1.934371  | 2.396013  |
| O  | -1.804622 | 1.393529  | 4.099018  |
| C  | -2.907851 | 0.837609  | 4.788155  |
| H  | -2.755314 | 1.045127  | 5.851073  |
| H  | -3.856659 | 1.297789  | 4.468132  |
| H  | -2.981314 | -0.250045 | 4.643070  |

TS2

|                             |                     |
|-----------------------------|---------------------|
| B3LYP SCF energy:           | -2488.96741127 a.u. |
| B3LYP enthalpy:             | -2488.177847 a.u.   |
| B3LYP free energy:          | -2488.321658 a.u.   |
| M06 SCF energy in solution: | -2488.19203068 a.u. |

M06 enthalpy in solution: -2487.402466 a.u.  
M06 free energy in solution: -2487.546277 a.u.  
Three lowest frequencies (cm-1): -561.4742 5.6122  
9.7266  
Imaginary frequency: -561.4742 cm-1

Cartesian coordinates

| ATOM | X         | Y         | Z         |
|------|-----------|-----------|-----------|
| C    | -2.138214 | -2.228198 | -1.961752 |
| C    | -2.348597 | -2.525186 | -0.608306 |
| C    | -3.390672 | -1.913396 | 0.090045  |
| C    | -4.241375 | -0.984719 | -0.528773 |
| C    | -4.049257 | -0.731148 | -1.895188 |
| C    | -3.020770 | -1.346365 | -2.602860 |
| H    | -1.671381 | -3.200778 | -0.090824 |
| H    | -3.530103 | -2.151359 | 1.142673  |
| H    | -4.702460 | -0.028037 | -2.406286 |
| C    | -5.290310 | -0.230789 | 0.247386  |
| H    | -5.732796 | -0.868450 | 1.024112  |
| H    | -6.113522 | 0.055106  | -0.420012 |
| Si   | -4.668137 | 1.373923  | 1.093716  |
| C    | -6.116229 | 2.609070  | 1.214839  |
| H    | -5.766367 | 3.421545  | 1.870097  |
| C    | -3.818880 | 1.013051  | 2.766411  |
| H    | -2.966808 | 0.359262  | 2.529616  |
| C    | -6.456068 | 3.233796  | -0.153446 |
| H    | -6.824111 | 2.478291  | -0.860211 |
| H    | -7.248630 | 3.986680  | -0.047470 |
| H    | -5.586181 | 3.716046  | -0.608579 |
| C    | -7.381479 | 1.998191  | 1.852154  |
| H    | -7.202772 | 1.612162  | 2.861173  |
| H    | -8.177385 | 2.751003  | 1.926379  |
| H    | -7.777165 | 1.172470  | 1.247231  |
| C    | -4.704596 | 0.245335  | 3.769242  |
| H    | -5.112816 | -0.681460 | 3.349445  |
| H    | -4.122654 | -0.029384 | 4.658575  |
| H    | -5.548286 | 0.854063  | 4.115143  |
| C    | -3.251240 | 2.292529  | 3.415112  |
| H    | -2.705877 | 2.048996  | 4.336397  |
| H    | -2.557615 | 2.820064  | 2.751762  |
| H    | -4.051443 | 2.992068  | 3.688576  |
| O    | -3.573212 | 2.153774  | 0.058717  |
| C    | -2.225691 | 2.271327  | -0.076750 |
| C    | -1.314520 | 1.273894  | 0.296458  |
| C    | -1.735230 | 3.457114  | -0.645310 |
| C    | 0.055182  | 1.477318  | 0.135836  |
| H    | -1.668524 | 0.332546  | 0.700482  |
| C    | -0.368542 | 3.641609  | -0.820123 |
| H    | -2.443819 | 4.219585  | -0.953611 |
| C    | 0.562244  | 2.660474  | -0.427860 |
| H    | 0.731379  | 0.699094  | 0.474043  |
| H    | -0.017099 | 4.556959  | -1.288525 |
| C    | 2.017992  | 2.906658  | -0.585665 |
| C    | 2.536882  | 4.181221  | -0.287804 |
| C    | 2.940231  | 1.931799  | -1.027060 |
| C    | 3.888872  | 4.488661  | -0.415333 |

|    |           |           |           |
|----|-----------|-----------|-----------|
| H  | 1.852615  | 4.933864  | 0.083033  |
| C  | 4.319034  | 2.227381  | -1.149954 |
| C  | 4.804386  | 3.489397  | -0.852002 |
| H  | 4.986845  | 1.446189  | -1.490927 |
| C  | 2.521682  | 0.622000  | -1.396519 |
| N  | 2.192709  | -0.453069 | -1.690422 |
| O  | 6.101287  | 3.874898  | -0.935808 |
| O  | 4.438848  | 5.691202  | -0.137578 |
| C  | 3.590580  | 6.742693  | 0.306130  |
| H  | 3.102569  | 6.489552  | 1.255640  |
| H  | 4.242824  | 7.604841  | 0.451385  |
| H  | 2.827051  | 6.983846  | -0.444137 |
| C  | 7.059275  | 2.908900  | -1.346099 |
| H  | 8.021901  | 3.421868  | -1.331022 |
| H  | 7.089106  | 2.055836  | -0.655932 |
| H  | 6.854932  | 2.547806  | -2.362556 |
| Pd | 1.016496  | -2.182149 | -1.684244 |
| H  | -2.885281 | -1.121239 | -3.657315 |
| C  | 2.012537  | -4.197252 | 2.079962  |
| C  | 1.310220  | -3.776327 | 0.780511  |
| O  | 0.266262  | -4.367937 | 0.475119  |
| O  | 1.896702  | -2.828012 | 0.125664  |
| H  | 2.240377  | -5.268440 | 2.005488  |
| H  | 1.303603  | -4.090664 | 2.909241  |
| N  | 3.207938  | -3.417992 | 2.325501  |
| H  | 3.467461  | -2.755169 | 1.607170  |
| C  | 3.832517  | -3.416067 | 3.525467  |
| O  | 3.534442  | -4.103528 | 4.489512  |
| O  | 4.872782  | -2.524257 | 3.517487  |
| C  | 5.605520  | -2.466426 | 4.741656  |
| H  | 4.962644  | -2.159255 | 5.572329  |
| H  | 6.045981  | -3.438514 | 4.983529  |
| H  | 6.391278  | -1.725981 | 4.578542  |
| C  | -0.974204 | -2.768484 | -2.765725 |
| H  | -0.067317 | -3.347157 | -1.582138 |
| C  | -0.098545 | -1.829995 | -3.408091 |
| H  | 0.418378  | -2.177686 | -4.301841 |
| H  | -0.386417 | -0.782084 | -3.403916 |
| O  | -1.126787 | -3.962691 | -3.422789 |
| C  | -1.622634 | -5.071741 | -2.665199 |
| H  | -1.635515 | -5.916577 | -3.355218 |
| H  | -0.954091 | -5.281979 | -1.821059 |
| H  | -2.635126 | -4.879727 | -2.293767 |

8

|                                               |                     |
|-----------------------------------------------|---------------------|
| B3LYP SCF energy:                             | -2488.97625570 a.u. |
| B3LYP enthalpy:                               | -2488.184447 a.u.   |
| B3LYP free energy:                            | -2488.330048 a.u.   |
| M06 SCF energy in solution:                   | -2488.19583874 a.u. |
| M06 enthalpy in solution:                     | -2487.404030 a.u.   |
| M06 free energy in solution:                  | -2487.549631 a.u.   |
| Three lowest frequencies (cm <sup>-1</sup> ): | 5.9600      8.7709  |
| 18.7008                                       |                     |

Cartesian coordinates

| ATOM | X         | Y         | Z         |
|------|-----------|-----------|-----------|
| C    | -1.215802 | -2.269513 | -2.055332 |
| C    | -1.392550 | -2.627232 | -0.707924 |
| C    | -2.599677 | -2.353061 | -0.064929 |
| C    | -3.660304 | -1.713737 | -0.727699 |
| C    | -3.451917 | -1.316568 | -2.056679 |
| C    | -2.253721 | -1.591743 | -2.712835 |
| H    | -0.580070 | -3.101746 | -0.162132 |
| H    | -2.723825 | -2.665392 | 0.970130  |
| H    | -4.249475 | -0.810168 | -2.595311 |
| C    | -4.996327 | -1.486000 | -0.059107 |
| H    | -5.263913 | -2.365321 | 0.543761  |
| H    | -5.773400 | -1.406421 | -0.830662 |
| Si   | -5.216179 | 0.034296  | 1.082792  |
| C    | -7.054575 | 0.541400  | 1.101263  |
| H    | -7.172366 | 1.202991  | 1.973944  |
| C    | -4.522440 | -0.300277 | 2.832309  |
| H    | -3.507365 | -0.700540 | 2.691021  |
| C    | -7.451100 | 1.350877  | -0.149773 |
| H    | -7.352948 | 0.750277  | -1.063760 |
| H    | -8.500231 | 1.669029  | -0.084840 |
| H    | -6.829943 | 2.242287  | -0.271996 |
| C    | -8.014566 | -0.653567 | 1.285012  |
| H    | -7.811897 | -1.229376 | 2.193884  |
| H    | -9.053620 | -0.303782 | 1.344688  |
| H    | -7.959552 | -1.346715 | 0.436179  |
| C    | -5.315395 | -1.372757 | 3.608364  |
| H    | -5.425404 | -2.308031 | 3.046255  |
| H    | -4.806440 | -1.617254 | 4.549704  |
| H    | -6.319702 | -1.019089 | 3.868950  |
| C    | -4.403726 | 0.990952  | 3.667458  |
| H    | -3.971084 | 0.775772  | 4.653370  |
| H    | -3.769042 | 1.739462  | 3.182132  |
| H    | -5.387016 | 1.447695  | 3.838421  |
| O    | -4.463238 | 1.393140  | 0.401535  |
| C    | -3.190771 | 1.850517  | 0.269854  |
| C    | -2.071071 | 1.194210  | 0.796311  |
| C    | -3.008990 | 3.055601  | -0.425418 |
| C    | -0.799644 | 1.730010  | 0.621475  |
| H    | -2.182015 | 0.259501  | 1.331109  |
| C    | -1.733000 | 3.578352  | -0.602791 |
| H    | -3.880379 | 3.558306  | -0.833210 |
| C    | -0.598777 | 2.921972  | -0.091625 |
| H    | 0.045744  | 1.211636  | 1.062404  |
| H    | -1.610288 | 4.495175  | -1.173460 |
| C    | 0.761110  | 3.471036  | -0.299307 |
| C    | 1.008276  | 4.842820  | -0.112609 |
| C    | 1.851684  | 2.665330  | -0.686174 |
| C    | 2.273296  | 5.399527  | -0.285646 |
| H    | 0.184941  | 5.469520  | 0.207119  |
| C    | 3.144433  | 3.215444  | -0.855069 |
| C    | 3.368653  | 4.568074  | -0.657699 |
| H    | 3.953169  | 2.559087  | -1.151143 |
| C    | 1.688964  | 1.279083  | -0.980552 |
| N    | 1.600395  | 0.150676  | -1.242289 |

|    |           |           |           |
|----|-----------|-----------|-----------|
| O  | 4.563462  | 5.194508  | -0.790306 |
| O  | 2.575035  | 6.704906  | -0.110914 |
| C  | 1.536473  | 7.598818  | 0.269077  |
| H  | 1.108681  | 7.324530  | 1.241526  |
| H  | 2.005872  | 8.580707  | 0.342267  |
| H  | 0.739706  | 7.629364  | -0.484787 |
| C  | 5.694139  | 4.407221  | -1.139721 |
| H  | 6.536280  | 5.099555  | -1.177588 |
| H  | 5.890952  | 3.632771  | -0.387229 |
| H  | 5.565708  | 3.935335  | -2.122625 |
| Pd | 1.866036  | -1.975915 | -1.714142 |
| H  | -2.134035 | -1.307504 | -3.754864 |
| C  | 3.395918  | -3.235684 | 2.135863  |
| C  | 2.526100  | -3.029378 | 0.887293  |
| O  | 1.449854  | -3.631460 | 0.820074  |
| O  | 3.024431  | -2.217137 | 0.007863  |
| H  | 3.607536  | -4.308420 | 2.227809  |
| H  | 2.800429  | -2.963362 | 3.015800  |
| N  | 4.620152  | -2.464418 | 2.077706  |
| H  | 4.783338  | -1.936207 | 1.231318  |
| C  | 5.580689  | -2.568930 | 3.024613  |
| O  | 5.512523  | -3.241988 | 4.040970  |
| O  | 6.661732  | -1.796306 | 2.691667  |
| C  | 7.730614  | -1.843355 | 3.637478  |
| H  | 7.406419  | -1.479405 | 4.617347  |
| H  | 8.109978  | -2.863200 | 3.752917  |
| H  | 8.509575  | -1.194378 | 3.232247  |
| C  | -0.021148 | -2.681900 | -2.865420 |
| H  | 2.296653  | -3.393876 | -2.071598 |
| C  | 0.784807  | -1.786966 | -3.578295 |
| H  | 1.375722  | -2.177712 | -4.402014 |
| H  | 0.496925  | -0.741905 | -3.626810 |
| O  | 0.062878  | -3.982798 | -3.247283 |
| C  | -0.217536 | -5.030944 | -2.311645 |
| H  | -0.065136 | -5.956615 | -2.868536 |
| H  | 0.479515  | -4.976758 | -1.468254 |
| H  | -1.249069 | -4.982411 | -1.949537 |
